# Supplementary material
Source: PubMed Central journal article supplement (PMC3254157)
Supplement: supp_kwr252_kwr252_Web_Appendix.pdf [file supp_kwr252_kwr252_Web_Appendix.pdf]

## Web Appendix: Software Code from SAS and WinBUGS for Models in Article

### 1. Frequentist ZIP Model in SAS (assumes vertical dataset where each row is a person-observation)

```
*zero inflated poisson, ;
title 'NLMIXED of ZIP Model for Midazolam';
proc nlmixed data=temC.Midaz3Vert;
    parameters b1=0 b2=0 b3=0 b4=0 b5=0 b6=0 b7=0 b8=0 b9=0 b10=0 b11=0
               a1=0 a2=0 a3=0 a4=0 a5=0 a6=0 a7=0 a8=0 a9=0 a10=0 a11=0 s2u=1
;

    /* linear predictor for the inflation probability */
    linpinfl = a1 + a2*shift + a3*night + a4*nonwhite + a5*male + a6*iqcodeA +
               a7*intubated + a8*APS
               + a9*icudeath + a10*age + a11*LOSlt5d ;
    ;

    /* infprob = inflation probability for zeros */
    /*          = logistic transform of the linear predictor*/
    infprob = 1/(1+exp(-linpinfl));
    /* Poisson mean */
    lambda = exp(b1 + b1R + b2*shift + b3*night + b4*nonwhite + b5*male +
b6*iqcodeA + b7*intubated + b8*APS
               + b9*icudeath5 + b10*age + b11*LOSlt5d );
    /* Build the ZIP log likelihood */
    if MidazDose=0 then
        ll = log(infprob + (1-infprob)*exp(-lambda));
    else ll = log((1-infprob)) - lambda + MidazDose*log(lambda) -
lgamma(MidazDose + 1);
    model MidazDose ~ general(ll);
    random b1R ~ normal(0,s2u) subject=studyid;

run;
```

### 2. Bayesian ZIP Model in WinBUGS (assumes horizontal dataset with single row per person)

```
model
{

#####
## we nest the 15 shifts within each studyid among the cohort of ICU survivors
##who were in ICU >= 3 days and received Midazolam during that time
## the Midazolam doses have been rounded to nearest unit for use with Poisson
## this is the classic mixture form of the ZIP model where occurrences of zeroes
## are modeled with a logistic regression and the positive integers with a Poisson
## and final likelihood is a mix of the two distributions

    for(studyid in 1 : N) {
        for(shift in 1 : NumShifts[studyid]) { # a column called NumShifts is person specific

# logistic likelihood for extra zeroes
# coefficients centered around the sample mean of study population to facilitate convergence
```

```

logExtraZ[studyid,shift] <- beta[1]
+ beta[2]*(shift - 8) +
+ beta[3]*(night[shift] - 0.33)
+ beta[4]*(nonwhite[studyid] - 0.17)
+ beta[5]*(male[studyid] - 0.55)
+ beta[6]*(iqcodea[studyid] - 0.3)
+ beta[7]*(intubated[studyid] - 0.75)
+ beta[8]*(aps[studyid] - 24.3)
+ beta[9]*(icudeath[studyid] - 0.17)
+ beta[10]*(age[studyid] - 73.4)
+ beta[11]*(losLT5d[studyid] - 0.29)
+ Rint[studyid, 1] # this is the random intercept for each person in logistic model

probZ[studyid,shift] <- 1/(1 + exp(-logExtraZ[studyid,shift])) # probZ = probability of a zero dose

# Poisson likelihood for positive integers

log(lambda[studyid,shift]) <- alpha[1]
+ alpha[2]*(shift - 8)
+ alpha[3]*(night[shift] - 0.33)
+ alpha[4]*(nonwhite[studyid] - 0.17)
+ alpha[5]*(male[studyid] - 0.55)
+ alpha[6]*(iqcodea[studyid] - 0.3)
+ alpha[7]*(intubated[studyid] - 0.75)
+ alpha[8]*(aps[studyid] - 24.3)
+ alpha[9]*(icudeath[studyid] - 0.17)
+ alpha[10]*(age[studyid] - 73.4)
+ alpha[11]*(losLT5d[studyid] - 0.29)
+ Rint[studyid, 2] # this is the random intercept for each person in Poisson model

probGTZ[studyid,shift] <- probZ[studyid,shift]*(1 - exp(-lambda[studyid,shift])) # prob of MidazDose > 0

d[studyid,shift] <- step(MidazDose[studyid,shift] - 1)

# Log Likelihood is a Mixture of logistic and Poisson

LogLLH[studyid,shift] <- (1 - d[studyid,shift])*log(1 - probGTZ[studyid,shift]) # for all zero doses
+ d[studyid,shift]*(log(probGTZ[studyid,shift]) + MidazDose[studyid,shift]*log(lambda[studyid,shift])
- lambda[studyid,shift] - loggam(MidazDose[studyid,shift] + 1) - log(1 - exp(- lambda[studyid,shift])))

# following lines employ the zeroes trick, i.e., WinBUGS' equivalent of general() in SAS
K <- 10000 # constant required for "zeros trick"
zeros[studyid,shift] <- 0
zeros[studyid,shift] ~ dpois(phi[studyid,shift])
phi[studyid,shift] <- -LogLLH[studyid,shift] + K

} # close shift loop
} # close studyid loop
#####
#####

# prior distributions for fixed model terms

for (i in 1:11)
{
alpha[i] ~ dnorm(0,0.1)
}

for (i in 1:11)
{
beta[i] ~ dnorm(0,0.1)
}

```

```
#####
# prior distributions for random terms

# first for normal locations
for (i in 1:113)
{
  Rint[i,1] ~ dnorm(0,tau1)
  m[i] <- psi*Rint[i,1]
  Rint[i,2] ~ dnorm(m[i], tau2)
}

psi~dnorm(0, 0.001)
tau1 ~ dgamma(0.1,0.1)
tau2 ~ dgamma(0.1,0.1)

# second for variances

sigma1 <- 1/sqrt(tau1)      # SD of Rint[,1]
denom1 <- pow(psi,2)/tau1 + 1/tau2
sigma2 <- sqrt(denom1)     # SD of Rint[,2]
denom2 <- sqrt(denom1/tau1)
num <- psi/tau1
rho <- num/denom2          # corr(Rint[,1],Rint[,2])

#####
}
#####
```

### 3. Bayesian Random Effects Poisson Model in WinBUGS (assumes horizontal dataset with single row per person)

```
model
{

#####
## we nest the 15 shifts within each studyid among the cohort of ICU survivors
##who were in ICU >= 3 days and received Midazolam during that time

for(studyid in 1 : N) {
for(shift in 1 : NumShifts[studyid]) { # a column called NumShifts is person specific

# Poisson likelihood for observed doses
MidazDose[studyid,shift] ~ dpois(mu[studyid,shift])
log(mu[studyid,shift]) <-
  alpha[1]
  + alpha[2]*(shift - 8)
  + alpha[3]*(iqcodea[studyid] - 0.3)
  + alpha[4]*(nonwhite[studyid] - 0.17)
  + alpha[5]*(male[studyid] - 0.55)
  + alpha[6]*(night[shift] - 0.33)
  + alpha[7]*(intubated[studyid] - 0.75)
  + alpha[8]*(aps[studyid] - 24.3)
  + alpha[9]*(icudeath[studyid] - 0.17)
  + alpha[10]*(age[studyid] - 73.4)
  + alpha[11]*(losLT5d[studyid] - 0.29)
  + theta[studyid] + perShift[studyid,shift] # random effects person-shift
```

```

}
}
#####
# Prior distribution for the person-shift intercepts
for(studyid in 1 : N) {
  for(shift in 1 : 15) {
    perShift[studyid,shift] ~dnorm(0,tau.perShift)
  }
}

# Prior distribution for the random intercepts
for (studyid in 1:N)
{
  theta[studyid]~dnorm(0,tau.theta)
}

#####

# prior distributions for the model coefficients

alpha[1:11]~dmnorm(alphamu[],Sigma[,])

#####
#Hyperprior distributions on inverse variance parameter of random effects

tau.theta ~ dgamma(1,1)
tau.perShift ~ dgamma(1,1)

}
#####
#####

```
